# Supplementary material for: APPROACH: Sensitive Detection of Exosomal Biomarkers by Aptamer-Mediated Proximity Ligation Assay and Time-Resolved Förster Resonance Energy Transfer
Source: MDPI journal article supplement (doi:10.3390/bios14050233), 2024-05-08
Supplement: s1 [file s1]

---

# APPROACH: Sensitive Detection of Exosomal Biomarkers by Aptamer-Mediated Proximity Ligation Assay and Time-Resolved Förster Resonance Energy Transfer

Ying Li <sup>1,†</sup>, Meiqi Qian <sup>1,†</sup>, Yongpeng Liu <sup>2</sup> and Xue Qiu <sup>1,\*</sup>

<sup>1</sup> Key Laboratory of Marine Drug, Ministry of Education, School of Medicine and Pharmacy, Ocean University of China, Qingdao 266003, China; Laboratory for Marine Drugs and Bioproducts, Qingdao National Laboratory for Marine Science and Technology, Qingdao 266237, China; liying9239@stu.ouc.edu.cn (Y.L.); qmq@stu.ouc.edu.cn (M.Q.)

<sup>2</sup> BGI Research, Shenzhen 518083, China; liuyongpeng@genomics.cn

\* Correspondence: qiuxue@ouc.edu.cn

† These authors contributed equally to this work.

|                                                                 |   |
|-----------------------------------------------------------------|---|
| Table S1. Sequences of oligonucleotides used in this work.....  | 2 |
| Figure S1. Spectral characterization of fluorescent probes..... | 3 |
| Figure S2. Flow cytometry analysis of RCA products (RCPs).....  | 3 |
| Figure S3. The HRMS spectrum of [CoraFluor-like-NHS].....       | 4 |

Table S1. Sequences of oligonucleotides used in this work.

| Name                    | Sequence (5'-3')                                                                                                                    |
|-------------------------|-------------------------------------------------------------------------------------------------------------------------------------|
| Apt-CD63 <sup>1</sup>   | ATATACACCCACCTCGCTCCCGTGACACTAATGCTATTTTTTTTTT<br>TTTTT <b>GACGCTAATAGTTAAGACGCT</b>                                                |
| Cho primer <sup>1</sup> | Cholesterol-<br>GACCCTAAGCATACATGCTCACTGACGCTAGGTTTTTTTTTTT<br>TTTT <b>ATATGACAGAACTAGACACTCTT</b>                                  |
| Apt-HER2                | TCTAAAAGGATTCTTCCCAAGGGGATCCAATTCAAACAGCTTTTT<br>TTTTTTTTTT <b>GACGCTAATAGTTAAGACGCT</b>                                            |
| Apt-PD-L1               | ACGGGCCACATCAACTCATTGATAGACAATGCGTCCACTGCCCCG<br>TTTTTTTTTTTTTT <b>GACGCTAATAGTTAAGACGCT</b>                                        |
| Backbone <sup>1</sup>   | Phosphate-<br><b>CTATTAGCGTCCAGTGAATTATACCCGGTCGCTTCTTTATGCC</b><br><b>GTCAAGAGTGTCTA</b>                                           |
| Connector <sup>1</sup>  | Phosphate- <b>GTTCTGTCATAITTAAGCGTCTTAA</b>                                                                                         |
| Tb probe                | Tb- <b>TGAATTATACCCGGT</b> (conjugation ratio: 0.87 Tb per DNA)                                                                     |
| Cy5 probe               | Cy5- <b>CGCTTCTTTATGCCG</b> (conjugation ratio: 0.92 Cy5 per DNA)                                                                   |
| Cho primer-<br>Cy5      | Cholesterol-.GACCCTAAGCATACATGCTCACTGACGCTAGGTTTTT<br>TTTTTTTTTTATATGACAGAACTAGACACTCTT-Cy5<br>(conjugation ratio: 1.5 Cy5 per DNA) |
| Apt-CD63-Cy5            | ATATACACCCACCTCGCTCCCGTGACACTAATGCTATTTTTTTTTT<br>TTTTTGACGCTAATAGTTAAGACGCT-Cy5<br>(conjugation ratio: 1.5 Cy5 per DNA)            |
| MU-Cy5                  | Cy5-CTTTTCGGGATTTATGC<br>(conjugation ratio: 1 Cy5 per DNA)                                                                         |

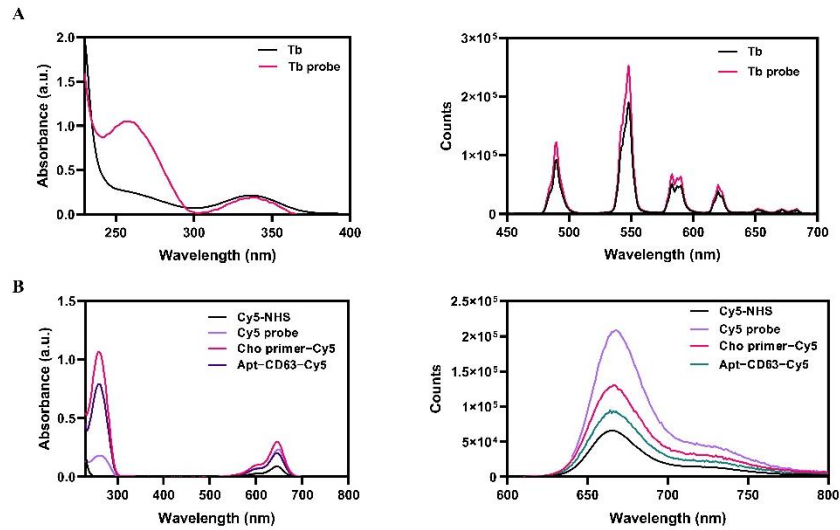

Figure S1. Spectral characterization of Tb probe, Cy5 probe, Cho primer-Cy5 and Apt-CD63-Cy5. The concentrations and labeling ratios (dye/oligonucleotides) were determined through absorption spectroscopy. The absorbance and emission spectra of Tb and Cy5 probes were presented in (A) and (B), respectively.

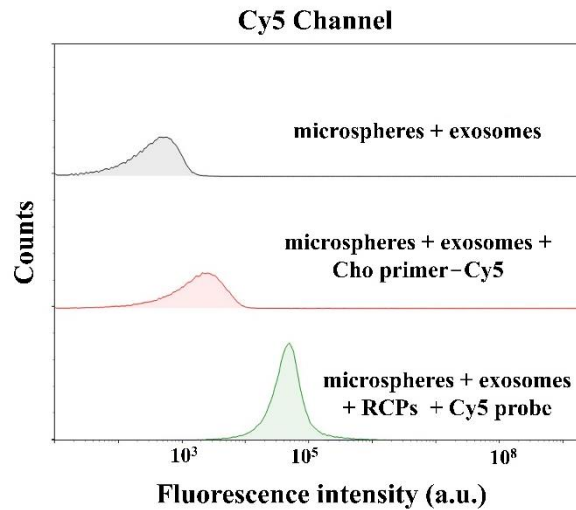

Figure S2. Flow cytometry analysis of RCA products (RCPs).

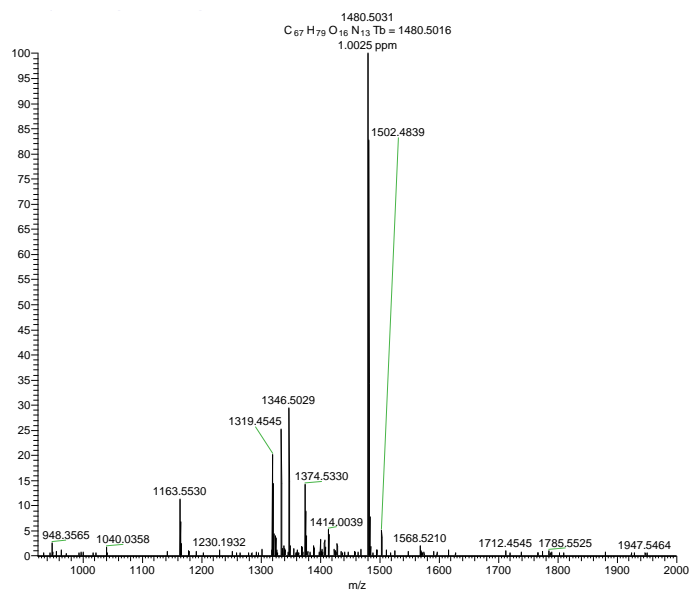

Figure S3. The HRMS spectrum of [CoraFluor-like-NHS].

References:

1. Zhao, X.; Luo, C.; Mei, Q.; Zhang, H.; Zhang, W.; Su, D.; Fu, W.; Luo, Y., Aptamer-Cholesterol-Mediated Proximity Ligation Assay for Accurate Identification of Exosomes. *Anal. Chem.* 2020, 92 (7), 5411-5418, DOI:10.1021/acs.analchem.0c00141.
